# Supplementary material
Source: HighWire-hosted journal article supplement (https://jnm.snmjournals.org/highwire/filestream/94821/field_highwire_adjunct_files/0/163360_Supplemental_Data.pdf)
Supplement: 163360_Supplemental_Data.pdf [file 163360_Supplemental_Data.pdf]

**SUPPLEMENTAL TABLE 1. Cox Regression Analysis and Log-rank Test Results**

**with Various Cut-off Values for RI-SUV**

|                         | Cut-off value for RI-SUV (%) |        |        |         |         |         |         |       |       |
|-------------------------|------------------------------|--------|--------|---------|---------|---------|---------|-------|-------|
|                         | -20                          | -15    | -10    | -5      | 0       | 5       | 10      | 15    | 20    |
| <u>Overall survival</u> |                              |        |        |         |         |         |         |       |       |
| HR for 3-y survival     | 2.39                         | 5.65   | 3.79   | 6.05    | 7.31    | 5.96    | 3.81    | 2.09  | 3.64  |
| <i>P</i> value          | 0.23                         | 0.019  | 0.015  | 0.00011 | 0.00013 | 0.00025 | 0.0019  | 0.12  | 0.096 |
| Log-rank <i>P</i> value | 0.22                         | 0.0084 | 0.0093 | 0.00023 | 0.00001 | 0.00005 | 0.00093 | 0.115 | 0.075 |
| <u>PFS</u>              |                              |        |        |         |         |         |         |       |       |
| HR for 1-y PFS          | 1.40                         | 3.03   | 2.60   | 3.28    | 3.68    | 3.23    | 2.73    | 1.87  | 1.60  |
| <i>P</i> value          | 0.48                         | 0.0092 | 0.011  | 0.00099 | 0.00043 | 0.0012  | 0.0043  | 0.12  | 0.52  |
| Log-rank <i>P</i> value | 0.48                         | 0.0063 | 0.0082 | 0.00053 | 0.00019 | 0.00069 | 0.0030  | 0.115 | 0.52  |

RI-SUV = retention index of standardized uptake value; HR = hazard ratio; PFS = progression-free survival.

**SUPPLEMENTAL TABLE 2. Predictive Value of RI-SUV (cut-off 0%) for 3-year**

**Mortality and 1-year Disease Progression**

|                            | Sensitivity, % (n) | Specificity, % (n) | PPV, % (n)      | NPV, % (n)      | Accuracy, % (n) |
|----------------------------|--------------------|--------------------|-----------------|-----------------|-----------------|
| 3-y mortality              | 83.3<br>(20/24)    | 71.4<br>(15/21)    | 76.9<br>(20/26) | 78.9<br>(15/19) | 77.8<br>(35/45) |
| 1-y disease<br>progression | 81.3<br>(13/16)    | 56.3<br>(18/32)    | 48.1<br>(13/27) | 85.7<br>(18/21) | 64.6<br>(31/48) |

PPV = positive predictive value; NPV = negative predictive value.

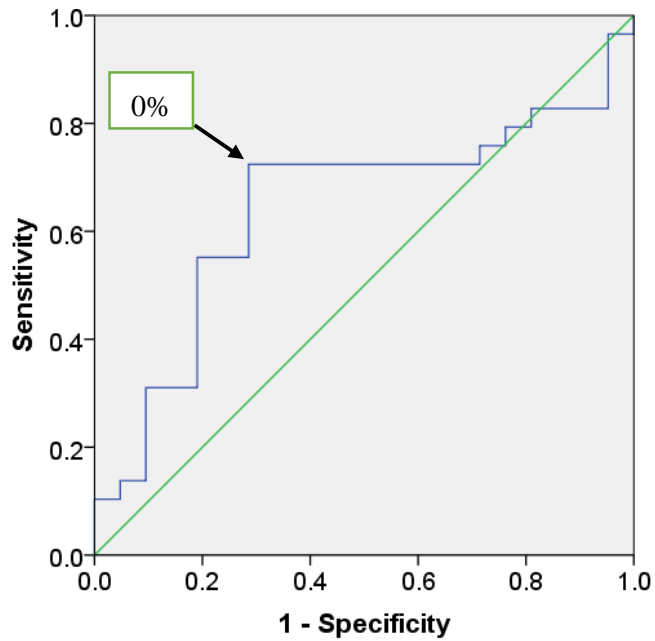

**SUPPLEMENTAL FIGURE 1. Receiver Operating Characteristic Curve of RI-SUV  
for Prediction of 3-year Survival**

According to the receiver operating characteristic curve, a cut-off value of 0% for RI-SUV was determined as the optimal cut-off point to predict long-term prognosis in patients with idiopathic pulmonary fibrosis.
